# Supplementary material for: Polyhydroxyalkanoate/Antifungal Polyene Formulations with Monomeric Hydroxyalkanoic Acids for Improved Antifungal Efficiency
Source: MDPI journal article supplement (doi:10.3390/antibiotics10060737), 2021-06-18
Supplement: s1 [file s1]

## *Supporting Information*

# **Polyhydroxyalkanoate/antifungal polyene formulations with monomeric hydroxyalkanoic acids for improved antifungal efficiency**

**Marina Pekmezovic <sup>1,2</sup>, Melina Kalagasidis Krusic <sup>3</sup>, Ivana Malagurski <sup>1</sup>, Jelena Milovanovic<sup>1</sup>, Karolina Stępień <sup>4</sup>, Maciej Guzik <sup>5</sup>, Romina Charifou <sup>6</sup>, Ramesh Babu <sup>6</sup>, Kevin O'Connor <sup>7</sup> and Jasmina Nikodinovic-Runic <sup>1,\*</sup>**

<sup>1</sup> Institute of Molecular Genetics and Genetic Engineering, University of Belgrade, Vojvode Stepe 444a, 11221 Belgrade, Serbia; [marinapekmezovic@gmail.com](mailto:marinapekmezovic@gmail.com)

<sup>2</sup> Department of Microbial Pathogenicity Mechanisms, Leibniz Institute for Natural Product Research and Infection Biology, Hans Knoell Institute, Beutenberstrasse 11a, 07745, Jena, Germany

<sup>3</sup> Faculty of Technology and Metallurgy, University of Belgrade, Karnegijeva 4, 11000 Belgrade, Serbia; [meli@tmf.bg.ac.rs](mailto:meli@tmf.bg.ac.rs)

<sup>4</sup> Department of Pharmaceutical Microbiology, Centre for Preclinical Research and Technology, Faculty of Pharmacy, Medical University of Warsaw, Banacha 1B, 02-097 Warsaw, Poland; [kstepien@wum.edu.pl](mailto:kstepien@wum.edu.pl)

<sup>5</sup> Jerzy Haber Institute of Catalysis and Surface Chemistry Polish Academy of Sciences, Niezapominajek 8, 30-239 Krakow, Poland; [maciej.guzik@ikifp.edu.pl](mailto:maciej.guzik@ikifp.edu.pl)

<sup>6</sup> AMBER Centre, CRANN Institute, School of Chemistry, Trinity College Dublin, Dublin, Ireland; [babup@tcd.ie](mailto:babup@tcd.ie)

<sup>7</sup> BiOrbic Bioeconomy SFI Research Centre and School of Biomolecular and Biomedical Sciences and Centre for Synthesis and Chemical Biology, University College Dublin, Belfield, Dublin 4, Ireland; [kevin.oconnor@ucd.ie](mailto:kevin.oconnor@ucd.ie)

\* Correspondence: [jasmina.nikodinovic@gmail.com](mailto:jasmina.nikodinovic@gmail.com); [jasmina.nikodinovic@imgge.bg.ac.rs](mailto:jasmina.nikodinovic@imgge.bg.ac.rs) Tel.: +381 11 397 60 34

**Table S1.** Values of melting temperatures and enthalpies obtained by DSC (1<sup>st</sup> heating) and values of the maximum decomposition temperatures determined by TGA

|                    | Control | NYS-9 | NYS-17 | AMB   | AMBM  |
|--------------------|---------|-------|--------|-------|-------|
| $T_m$ (°C)         | 49.31   | 49.22 | 49.77  | 44.19 | 44.28 |
| $\Delta H_m$ (J/g) | 25.67   | 21.59 | 24.09  | 22.63 | 21.62 |
| $T_{max}$ (°C)     | 256.6   | 268.0 | 258.1  | 264.7 | 260.0 |

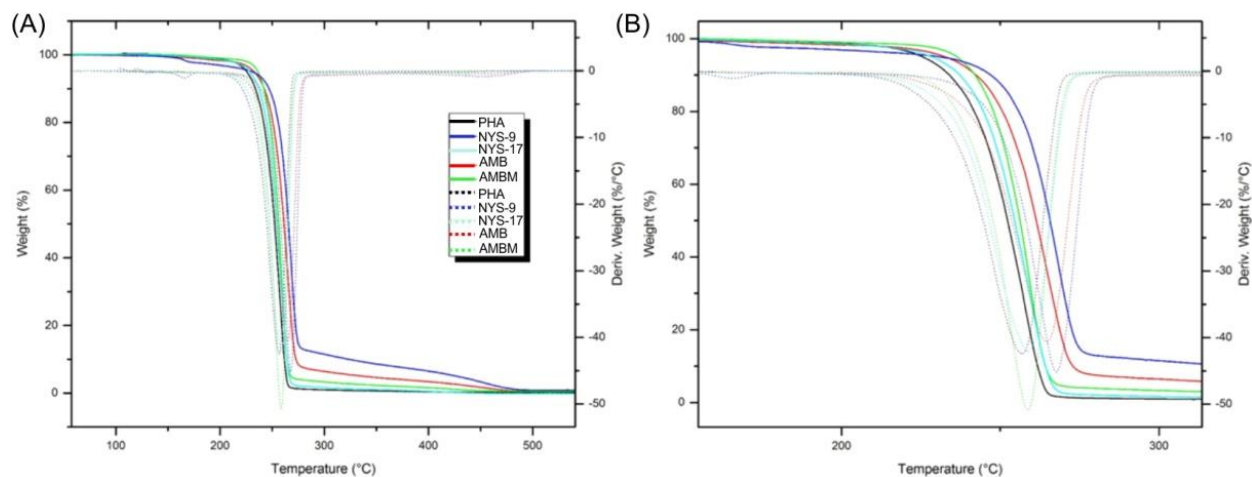

**Figure S1.** TGA thermograms obtained for the different samples (A) and close up (100 °C – 300 °C) of the TGA thermograms (B).

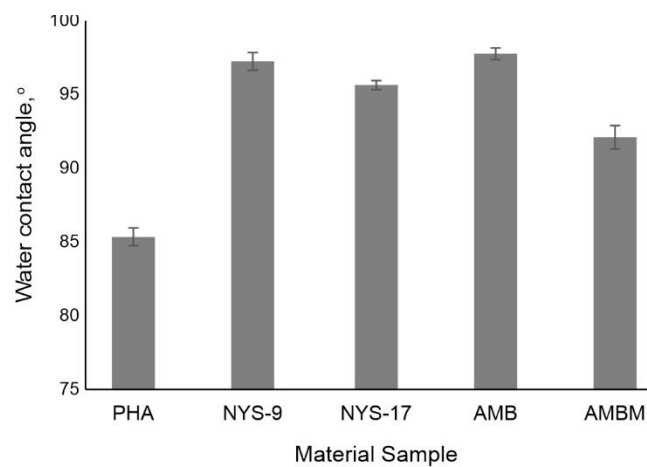

**Figure S2.** Water contact angle of PHA materials. The values are represented as mean  $\pm$  standard deviation.

**Table S2.** Zones of inhibition [mm] of PHA films containing polyenes against clinical *Candida* spp. strain.

| <i>Candida albicans</i> 329UCK |                      |
|--------------------------------|----------------------|
| Material                       | Inhibition zone [mm] |
| NYS-17                         | 26                   |
| NYS-9                          | 22                   |
| AMBM                           | 19                   |
| AMB                            | 14                   |
| PHA                            | 0                    |
